# Supplementary material for: Anti-drug Antibody Responses Impair Prophylaxis Mediated by AAV-Delivered HIV-1 Broadly Neutralizing Antibodies
Source: PubMed Central journal article supplement (PMC6403482; doi:10.1016/j.ymthe.2019.01.004), 2019-01-12
Supplement: mmc1.pdf [file mmc1.pdf]

## **Supplemental Information**

### **Anti-drug Antibody Responses Impair**

### **Prophylaxis Mediated by AAV-Delivered**

### **HIV-1 Broadly Neutralizing Antibodies**

**Matthew R. Gardner, Ina Fetzer, Lisa M. Kattenhorn, Meredith E. Davis-Gardner, Amber S. Zhou, Barnett Alfant, Jesse A. Weber, Hema R. Kondur, Jose M. Martinez-Navio, Sebastian P. Fuchs, Ronald C. Desrosiers, Guangping Gao, Jeffrey D. Lifson, and Michael Farzan**

**A****Macaques Expressing 3BNC117 & 10-1074 IgG1****anti-3BNC117 IgG2**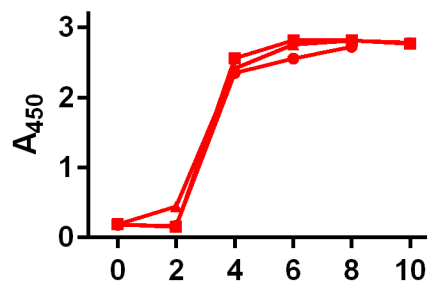

● 124-12  
 ■ 129-12  
 ▲ 228-12

**anti-10-1074 IgG2**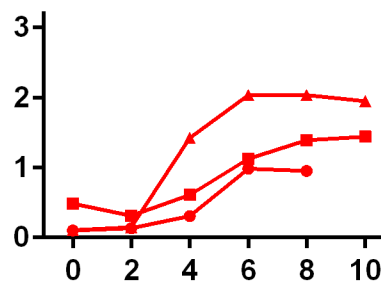

● 124-12  
 ■ 129-12  
 ▲ 228-12

**Macaques Expressing NIH45-46 & PGT121 IgG1****anti-NIH45-46 IgG2**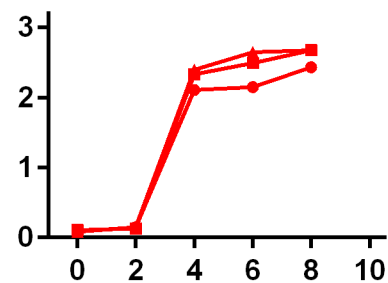

● 294-12  
 ■ 329-12  
 ▲ 330-12

**anti-PGT121 IgG2**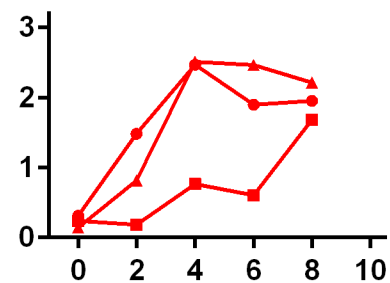

● 294-12  
 ■ 329-12  
 ▲ 330-12

**B****Macaques Expressing 3BNC117 & 10-1074 IgG2****anti-3BNC117 IgG1**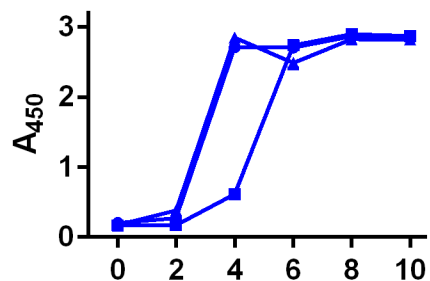

● 234-12  
 ■ 240-12  
 ▲ 296-12

**anti-10-1074 IgG1**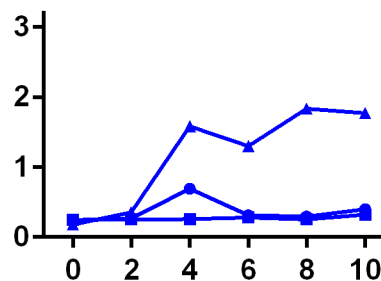

● 234-12  
 ■ 240-12  
 ▲ 296-12

**Macaques Expressing NIH45-46 & PGT121 IgG2****anti-NIH45-46 IgG1**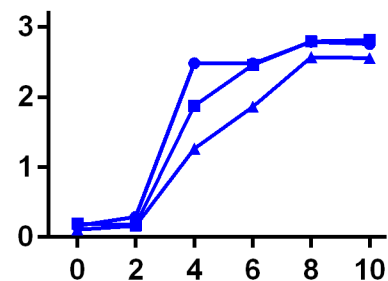

● 148-12  
 ■ 173-12  
 ▲ 209-12

**anti-PGT121 IgG1**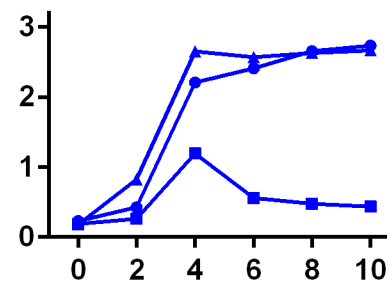

● 148-12  
 ■ 173-12  
 ▲ 209-12

**A****Macaques Expressing 3BNC117 & 10-1074 IgG1**

anti-NIH45-46 IgG1

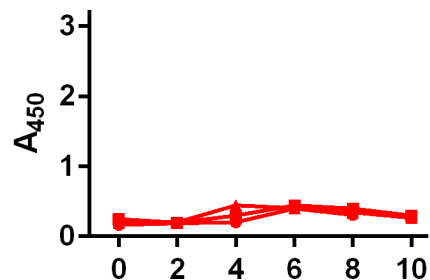

● 124-12  
■ 129-12●  
▲ 228-12

anti-PGT121 IgG1

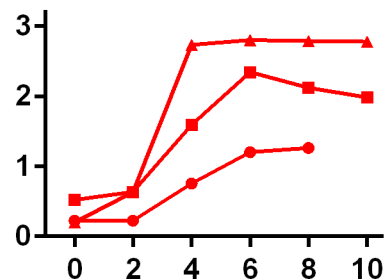

● 124-12  
■ 129-12●  
▲ 228-12

**Macaques Expressing NIH45-46 & PGT121 IgG1**

anti-3BNC117 IgG1

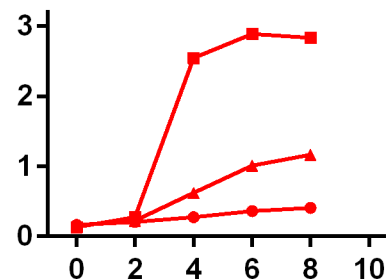

● 294-12  
■ 329-12  
▲ 330-12

anti-10-1074 IgG1

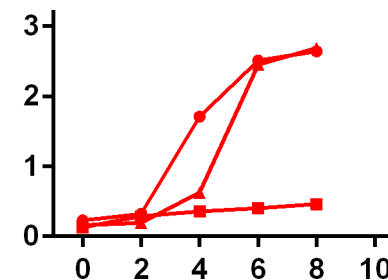

● 294-12  
■ 329-12  
▲ 330-12

**B****Macaques Expressing 3BNC117 & 10-1074 IgG2**

anti-NIH45-46 IgG2

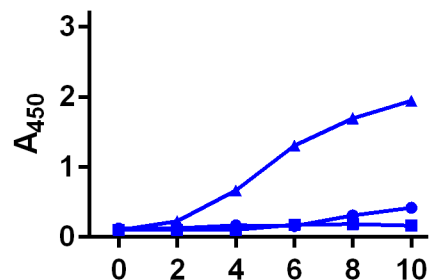

● 234-12●  
■ 240-12●  
▲ 296-12

anti-PGT121 IgG2

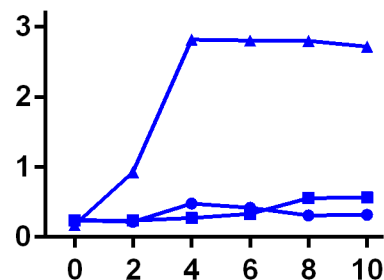

● 234-12●  
■ 240-12●  
▲ 296-12

**Macaques Expressing NIH45-46 & PGT121 IgG2**

anti-3BNC117 IgG2

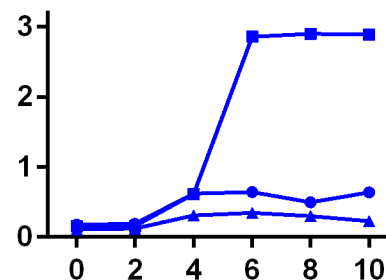

● 148-12  
■ 173-12●  
▲ 209-12

anti-10-1074 IgG2

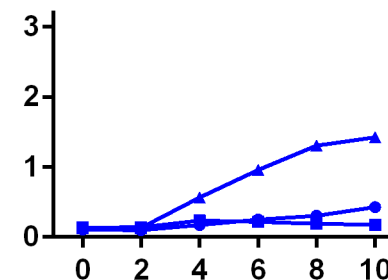

● 148-12  
■ 173-12●  
▲ 209-12

**A**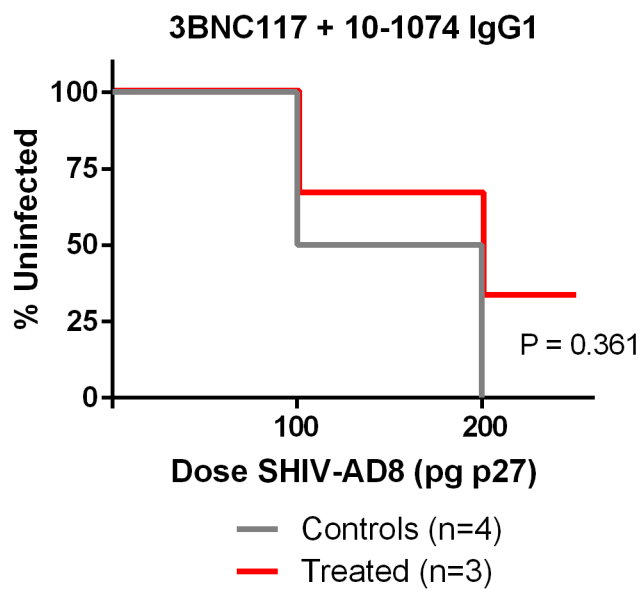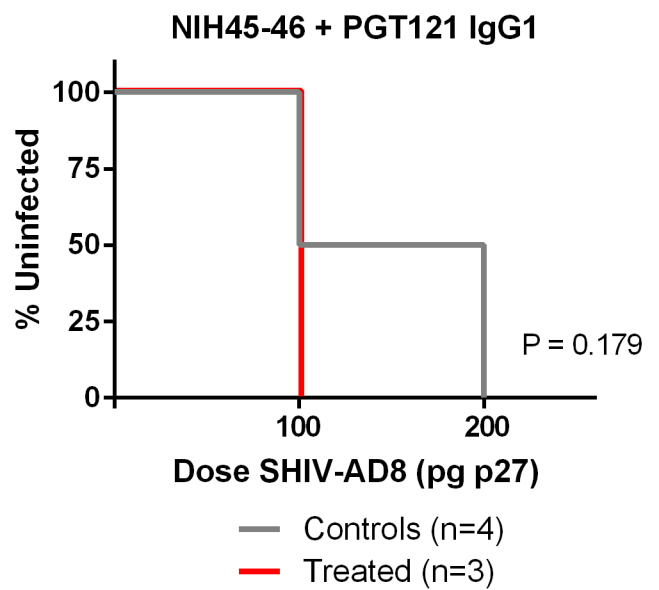**B**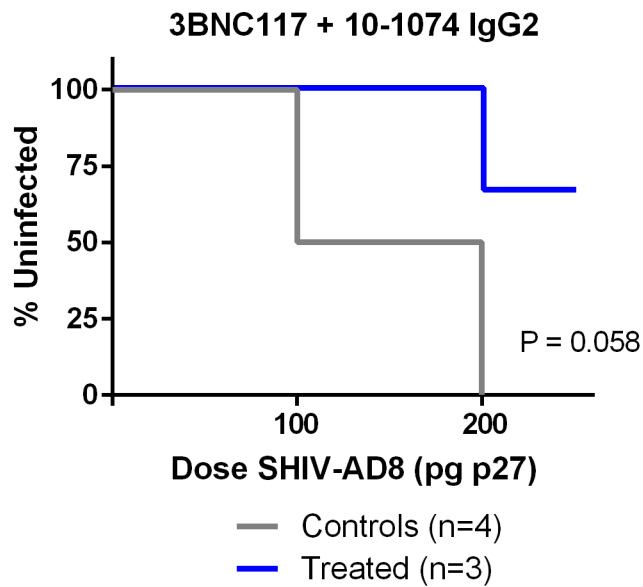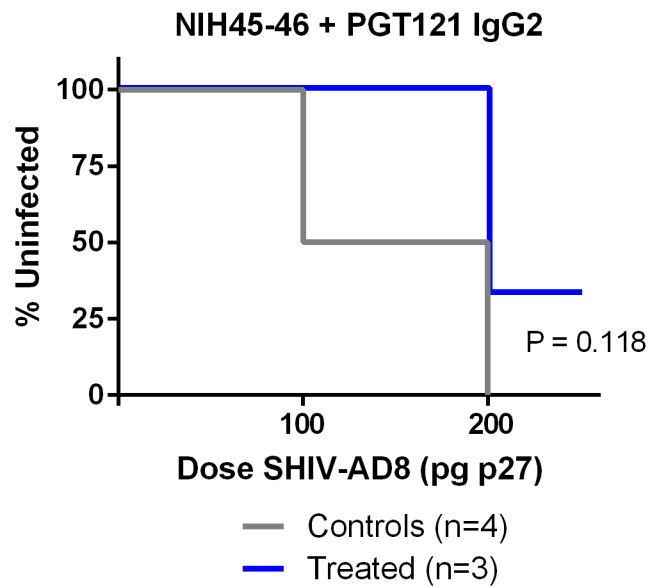**C**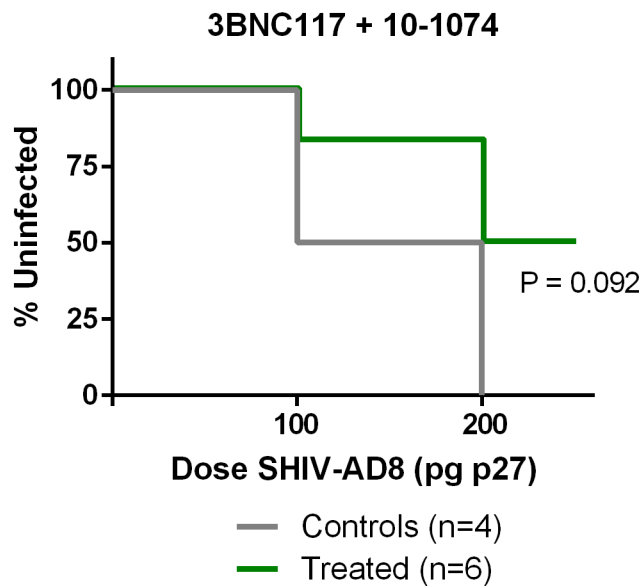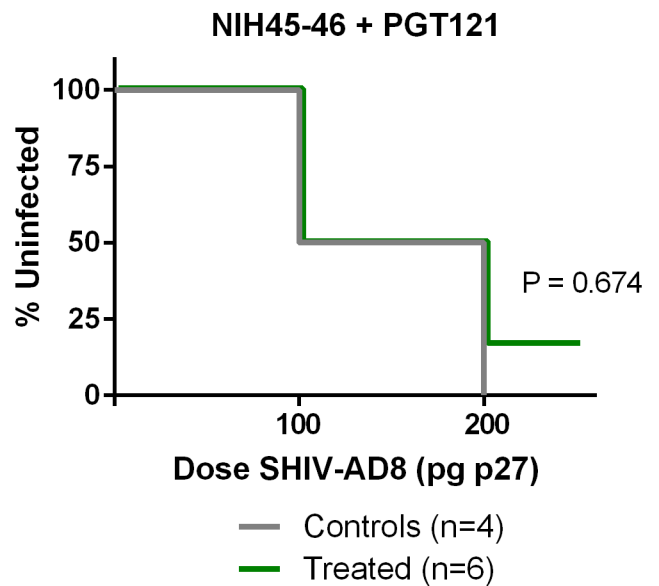

## **Supplemental Figure Legends**

### **Figure S1. Host ADA responses target bNAb variable regions.**

(A-B) Assays similar to those described in Figure 4 except that sera diluted 20-fold from macaques expressing IgG1 (A) or IgG2 (B) antibodies were analyzed using plates coated with their IgG2 and IgG1 counterparts, respectively. Values indicate absorbance at 450 nM. Error bars indicate range of measured values. Dots to the right of animal identification indicate protection from SHIV-AD8, as described in Figure 6.

### **Figure S2. Cross-reactive ADA to bNAbs within the same class.**

(A-B) Assays similar to those described in Figure 4 except that sera diluted 20-fold from macaques expressing IgG1 (A) or IgG2 (B) antibodies were analyzed using plates coated with antibodies different from those which the indicated macaques expressed. The sera from animals expressing 3BNC117 and 10-1074 was analyzed with plates coated with NIH45-46 and PGT121 of the same isotype, and vice versa, as indicated. Values indicate absorbance at 450 nM. Error bars indicate range of measured values. Dots to the right of animal identification indicate protection from SHIV-AD8, as described in Figure 6.

### **Figure S3. Infection curves for macaques expressing individual bNAb pairs.**

(A-B) Kaplan-Meier curves indicating infection of control macaques (grey) or macaques expressing indicated IgG1 (A, red) or IgG2 (B, blue) bNAb pairs, with challenge dose indicated on the horizontal axis. (C) Kaplan-Meier curves indicating infection of control macaques (grey) and indicated bNAb pairs regardless of isotype (green). No significant differences were observed in A-C (Mantel-Cox test).
